# Supplementary material for: Improvement of hemocompatibility on materials by photoimmobilization of poly(ethylene glycol)
Source: Royal Society of Chemistry journal article supplement (doi:10.1039/c2jm15435h), 2012-01-01
Supplement: c2jm15435h.pdf [file c2jm15435h.pdf]

## Supporting Information

### **Improvement of hemocompatibility on materials by photoimmobilization of poly(ethylene glycol)**

Wei-Hsuan Kuo<sup>1</sup>, Meng-Jiy Wang<sup>1</sup>, Chia-Wen Chang<sup>1</sup>, Da-Chin Wei<sup>2</sup>, Juin-Yih Lai<sup>2</sup>, Wei-Bor Tsai<sup>3\*</sup>, Chiapyng Lee<sup>1\*</sup>

<sup>1</sup> Department of Chemical Engineering, National Taiwan University of Science and Technology, 43, Keelung Rd., Sec. 4, Taipei 106, Taiwan

<sup>2</sup> R&D Center for Membrane Technology and Department of Chemical Engineering, Chung Yuan Christian University, 200, Chung Pei Rd., Chung Li 320, Taoyuan, Taiwan

<sup>3</sup> Department of Chemical Engineering, National Taiwan University, No. 1, Sec. 4, Roosevelt Rd., Taipei 106, Taiwan

Fax: +886-2-3366-3996; E-mail: WeiborTsai@ntu.edu.tw

## 1. NMR analyses of the synthesized poly(PEGMA-co-AA) and

### poly(PEGMA-co-AA-g-Az)

The synthesized poly(PEGMA-co-AA-g-Az) with two different PEGMA feed ratio (70 mol.% and 90 mol.%) was analyzed by  $^1\text{H-NMR}$  (Avance-500Hz, Bruker) with *d*-DMSO as solvent. The NMR spectra were shown in Figure S1. The peak for *d*-DMSO at  $\delta = 2.5$  ppm was used for calibration. The peaks at  $\delta = 0.7$ -1.0 ppm, 1.1-2.1 ppm, 3.3-3.7 ppm and 4.0 ppm are ascribed to the protons at the *b*, *a*, *e*, and *d* sites of the PEGMA segments,<sup>1</sup> respectively. The appearance of the signals for Az protons (6.9-7.7 ppm)<sup>2,3</sup> in the  $^1\text{H-NMR}$  spectra of Az-grafted copolymers indicated that Az groups were incorporated into poly(PEGMA-co-AA). Because the  $-\text{CH}_2-$  sites “d” were only found in PEGMA, the ratio of PEGMA in copolymer was calculated by dividing  $-\text{CH}_2-$  sites “d” with the summation of all  $-\text{CH}_2-$  sites “a” which is the total  $-\text{CH}_2-$  sites composed of PEGMA, PAA and Az. The PEGMA compositions in poly(PEGMA-co-AA) from two different feed ratios and the Az contents in poly(PEGMA-co-AA-g-Az) were calculated from the area of the corresponding peaks in the  $^1\text{H-NMR}$  spectra and listed in Table 1.

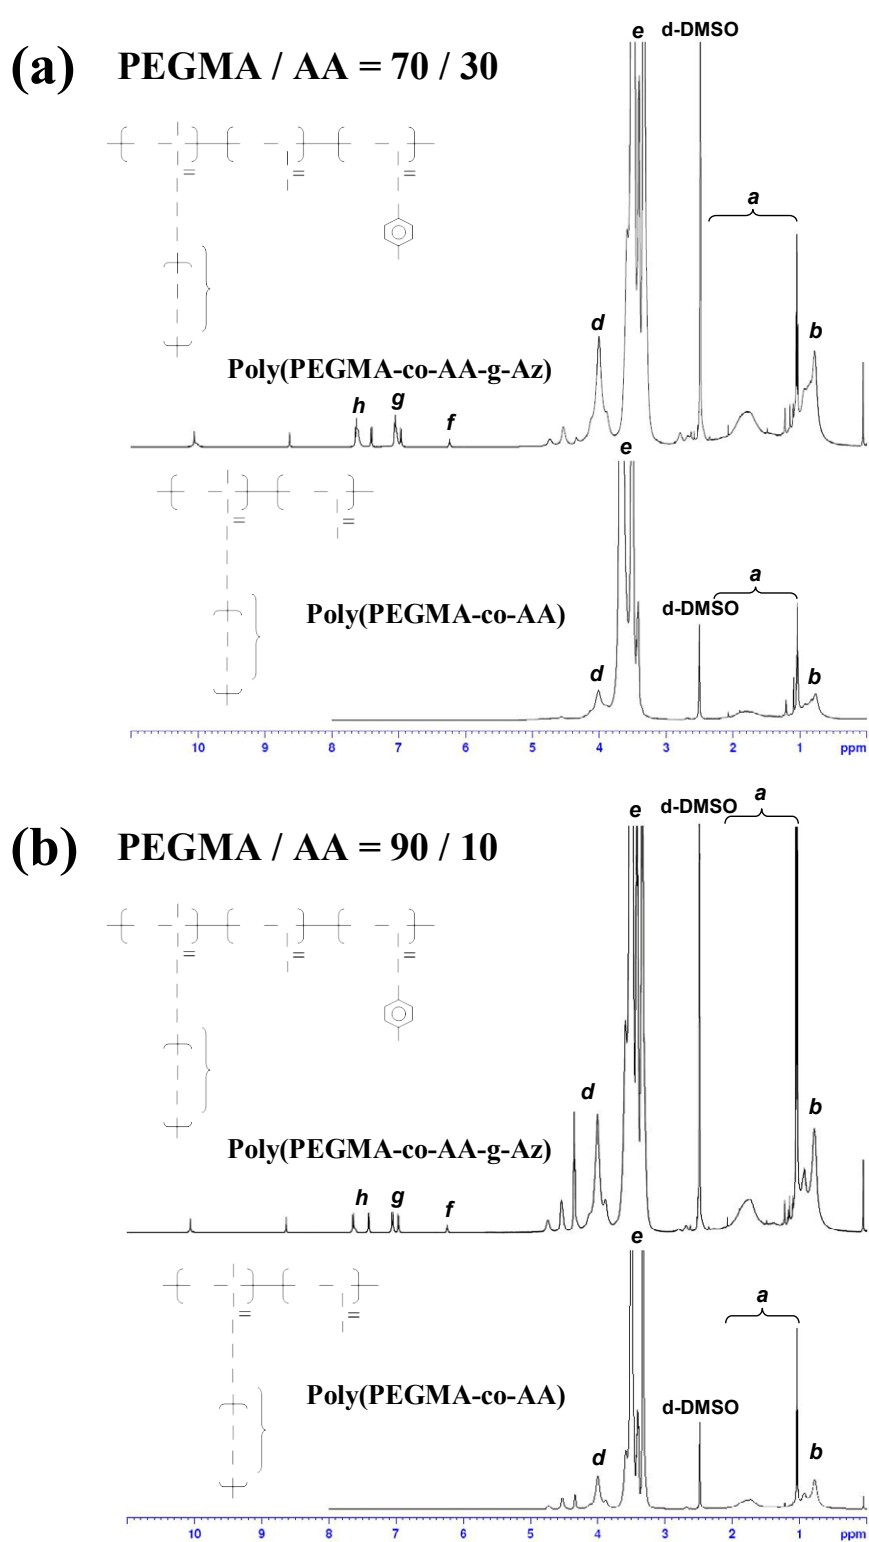

**Figure S1.**  $^1\text{H-NMR}$  spectra for poly(PEGMA-co-AA) and poly(PEGMA-co-AA-g-Az) copolymers with (a) 70 mol% and (b) 90 mol% PEGMA feed ratio in copolymerization (in  $d\text{-DMSO}$  solvent).

## 2. Surface morphology of poly(PEGMA-co-AA-g-Az) coating surface

### characterized by AFM images

The surface morphology of TCPS coated with poly(PEGMA-co-AA) and poly(PEGMA-co-AA-g-Az) was characterized by AFM (Figure S2). TCPS surface revealed a smooth morphology with root-mean-square roughness ( $R_{\text{rms}}$ ) of 3.488 nm. The substrates coated with both PEG70-AA and PEG90-AA presented scattered peaks, accompanied with a significant increase in  $R_{\text{rms}}$  to 13.05 nm and 11.53 nm, respectively. After NaOH treatment, PEG90-AA surface became smoother ( $R_{\text{rms}} = 4.66$  nm) compared to the un-treated one, indicating the unstability of PEG coating without crosslinking. The deposition of PEG70-AA-Az created similar surface roughness compared to that without Az conjugation; however, the surface deposited with PEG90-AA-Az became smooth with a  $R_{\text{rms}}$  of 2.008 nm. The surface roughness of UV-crosslinked PEG90-AA-Az after 0.1N NaOH treatment revealed similar surface morphology ( $R_{\text{rms}} = 3.019$  nm), suggesting the stability of the crosslinked PEG90-AA-Az coating.

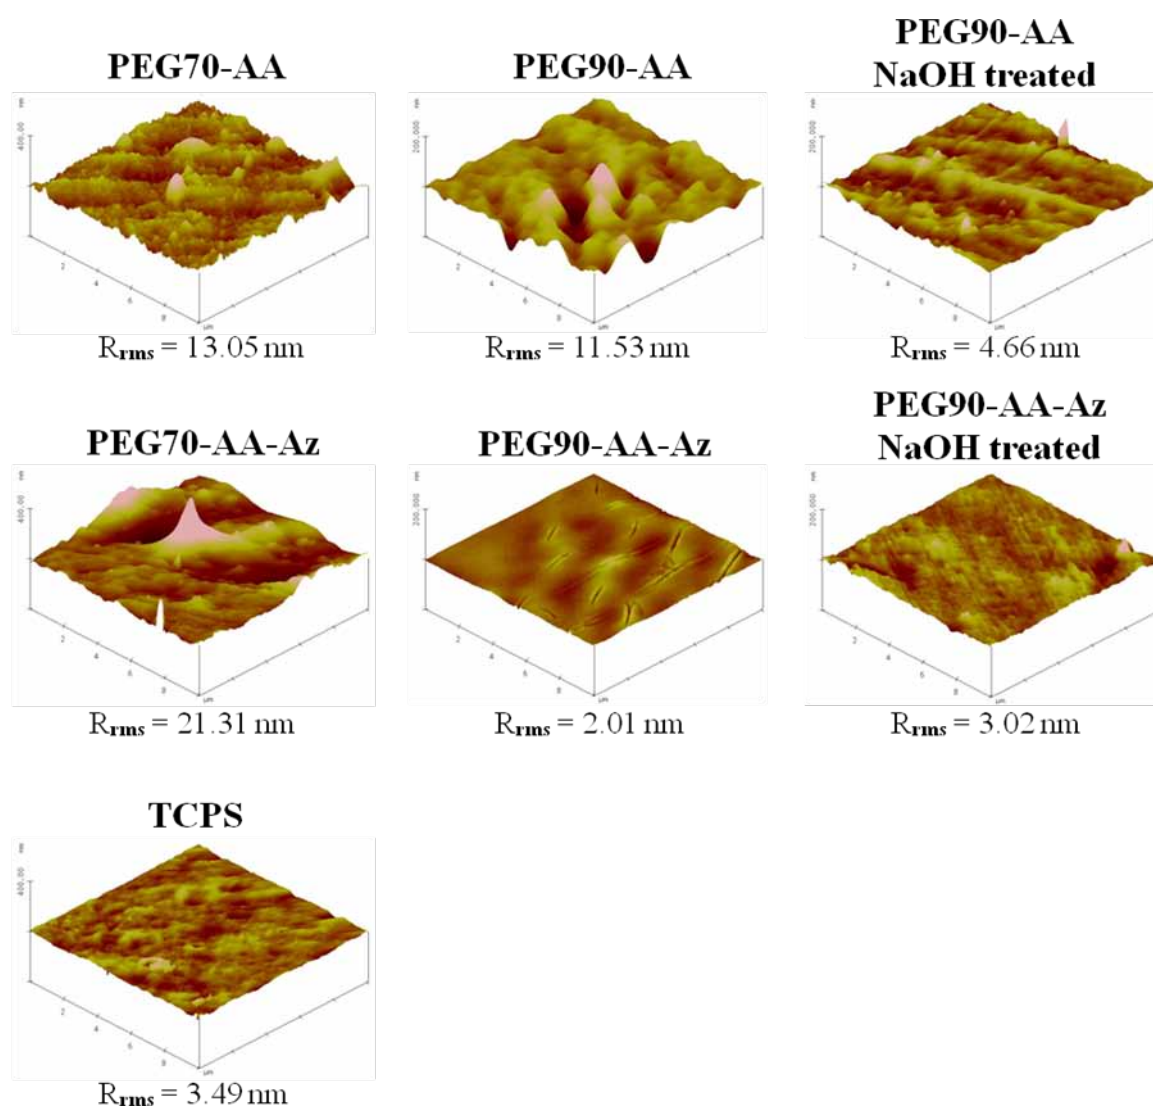

**Figure S2.** AFM images of PEG70-AA, PEG90-AA, PEG90-AA after NaOH treatment, PEG70-AA-Az, PEG90-AA-Az, PEG90-AA-Az after NaOH treatment coating surfaces and TCPS substrate. (the images are in  $10 \mu\text{m} \times 10 \mu\text{m}$  scale)

## Reference

1. J. A. Jones, N. Novo, K. Flagler, C. D. Pagnucco, S. Carew, C. Cheong, X. Z. Kong, N. A. D. Burke, H. D. H. Stöver, *J. Polym. Sci., Part A: Polym. Chem.* **2005**, 43, 6095.
2. Y. Ito, H. Hasuda, M. Sakuragi, S. Tsuzuki, *Acta Biomater.* **2007**, 3, 1024.
3. H. W. Chien, T. Y. Chang, W. B. Tsai, *Biomaterials* **2009**, 30, 2209.
